# Supplementary material for: pH-Driven Polymorphism of Insulin Amyloid-Like Fibrils
Source: PubMed Central journal article supplement (PMC4551895; doi:10.1371/journal.pone.0136602), 2015-08-27

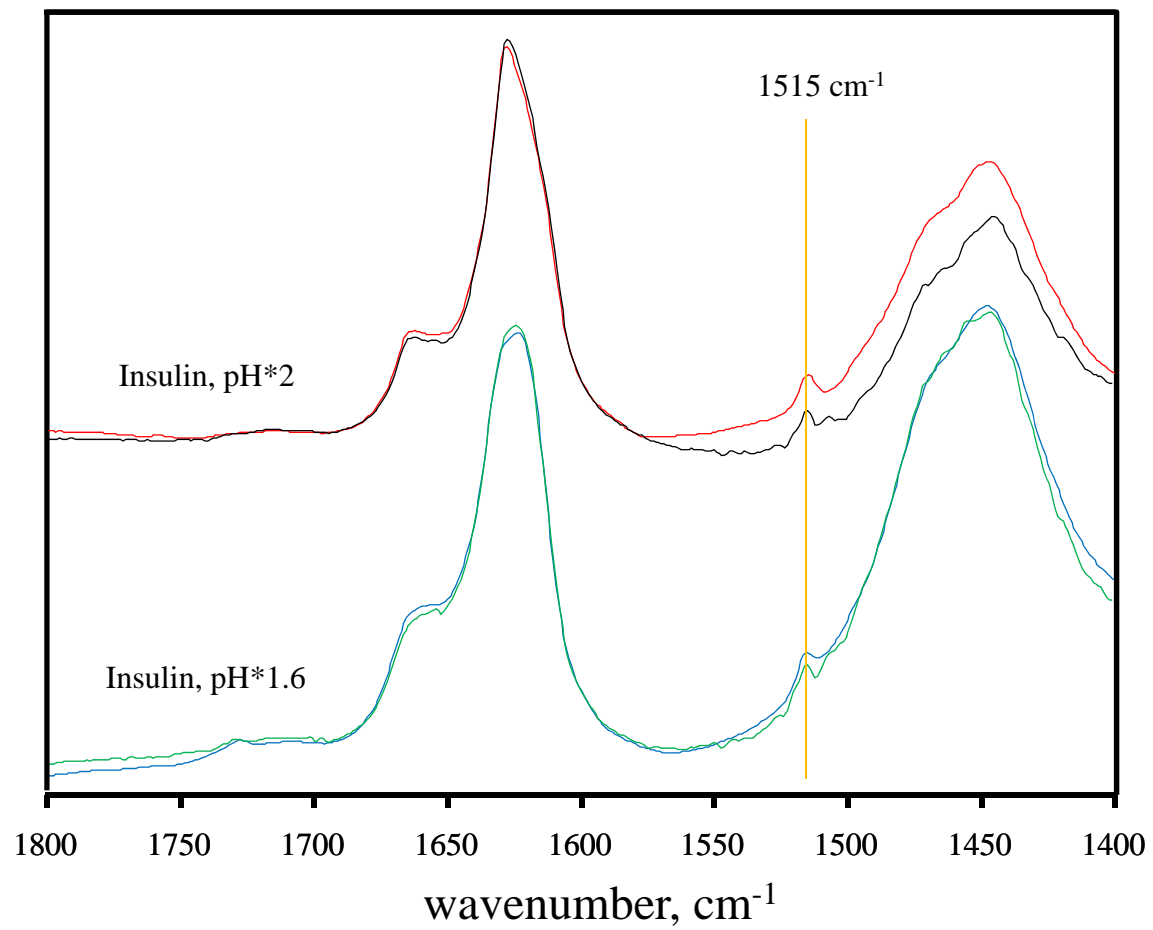

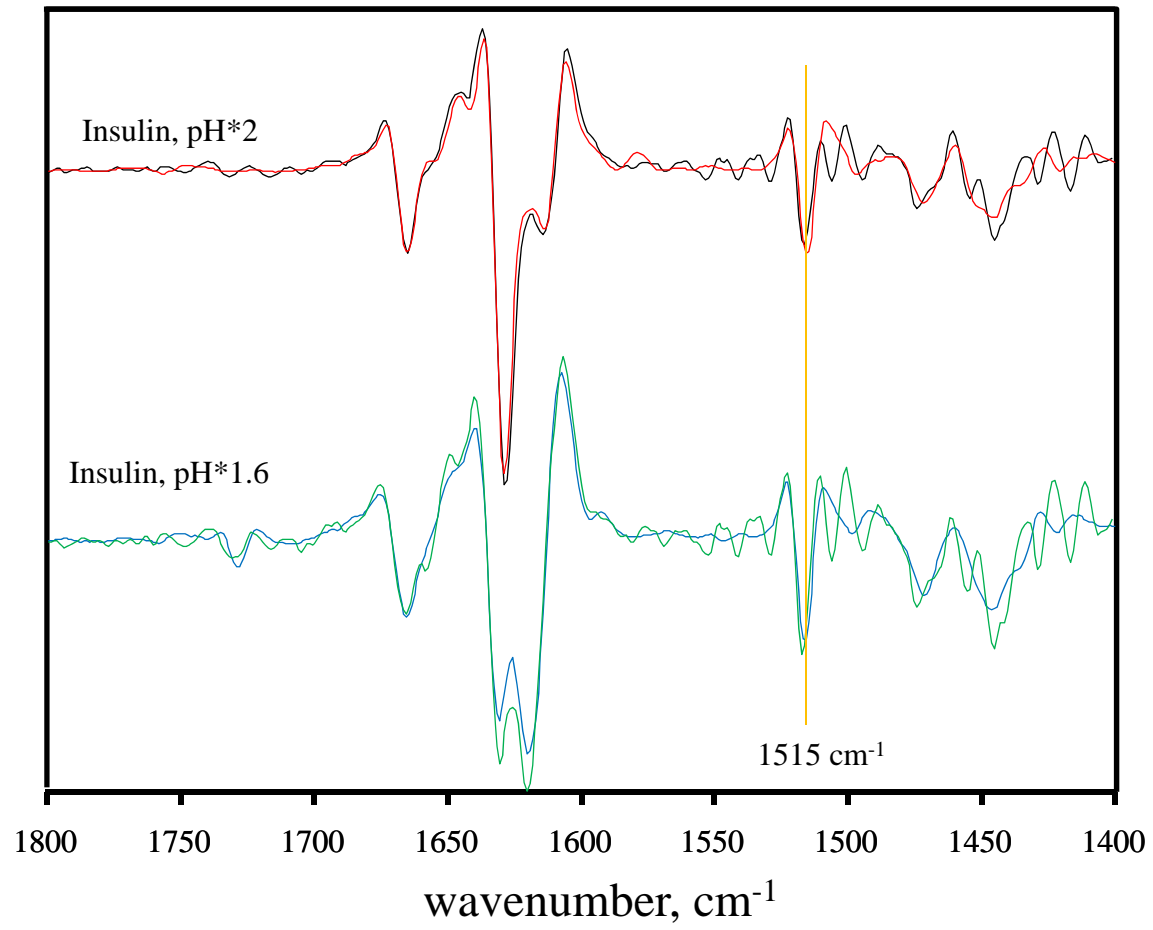

Supplement: pone.0136602.s001.pdf [file pone.0136602.s001.pdf]
