# Supplementary material for: pH-Driven Polymorphism of Insulin Amyloid-Like Fibrils
Source: PubMed Central journal article supplement (PMC4551895; doi:10.1371/journal.pone.0136602), 2015-08-27

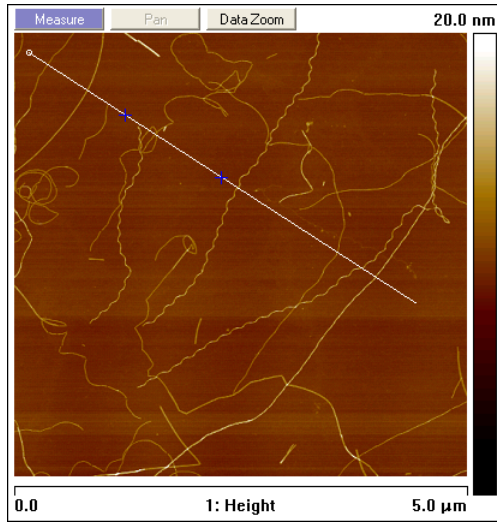

Insulin, 5% DMSO, pH\*1.6

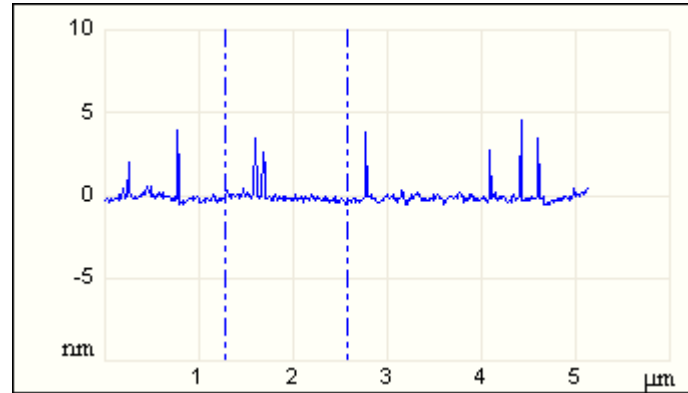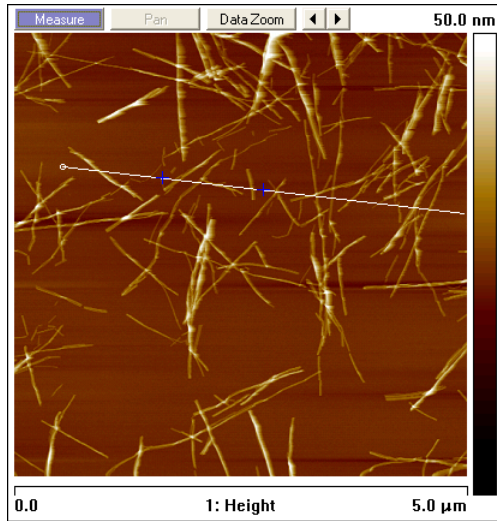

Insulin, 5% DMSO, pH\*2

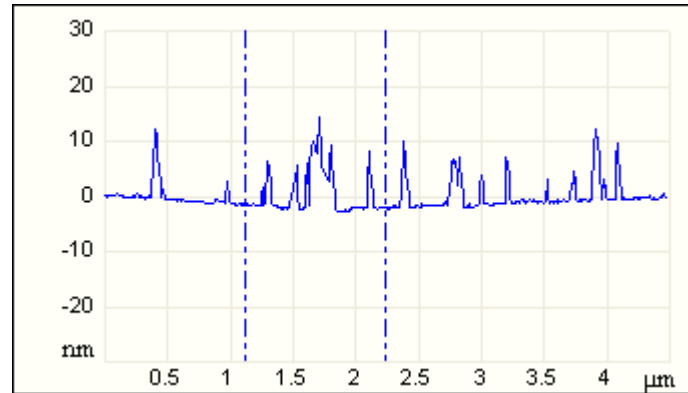

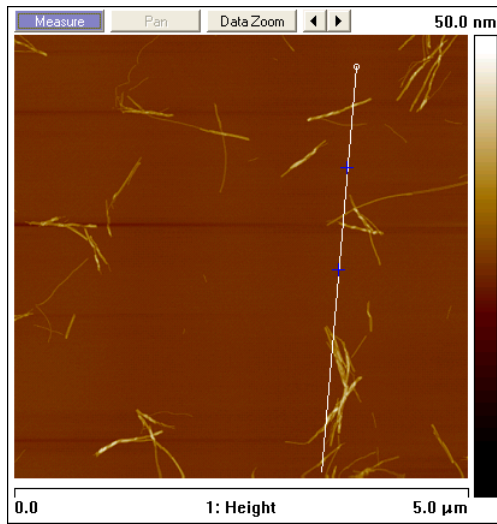

Insulin, pH\*1.6

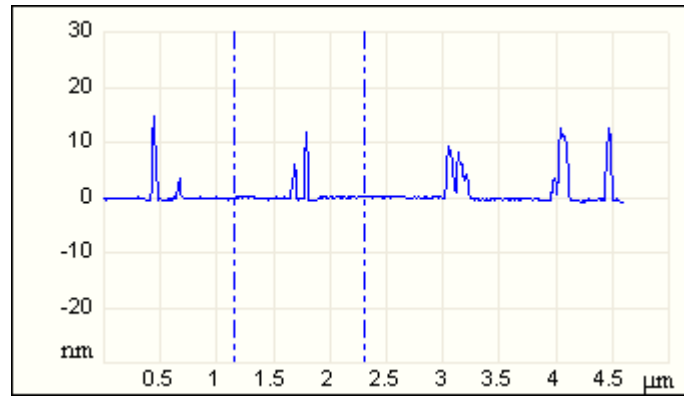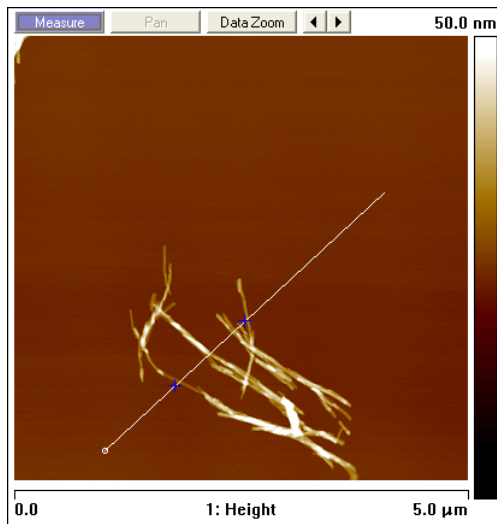

Insulin, pH\*2

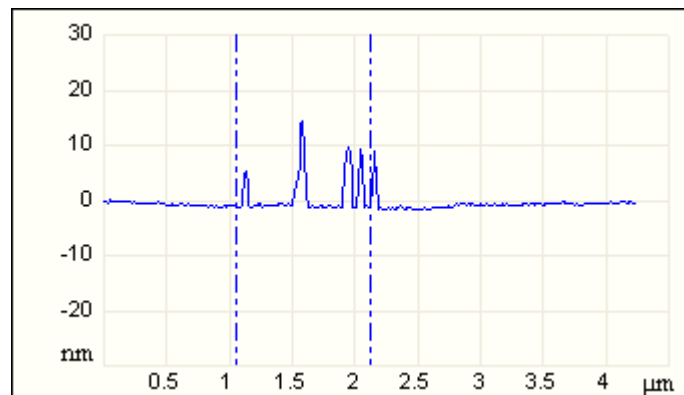

Supplement: pone.0136602.s002.pdf [file pone.0136602.s002.pdf]
